# Supplementary material
Source: HighWire-hosted journal article supplement (http://www.qdcxjkg.com/highwire/filestream/128744/field_highwire_adjunct_files/0/ERJ-01725-2015_Stradling.pdf)
Supplement: ERJ-01725-2015_Stradling.pdf [file ERJ-01725-2015_Stradling.pdf]

Warning: This form is not supported with the current version of Acrobat or Adobe Reader.  
Upgrade to the latest version for full support.
